# Supplementary material for: Global transcriptional landscape and promoter mapping of the gut commensal Bifidobacterium breve UCC2003
Source: PubMed Central journal article supplement (PMC5746004; doi:10.1186/s12864-017-4387-x), 2017-12-28

a)

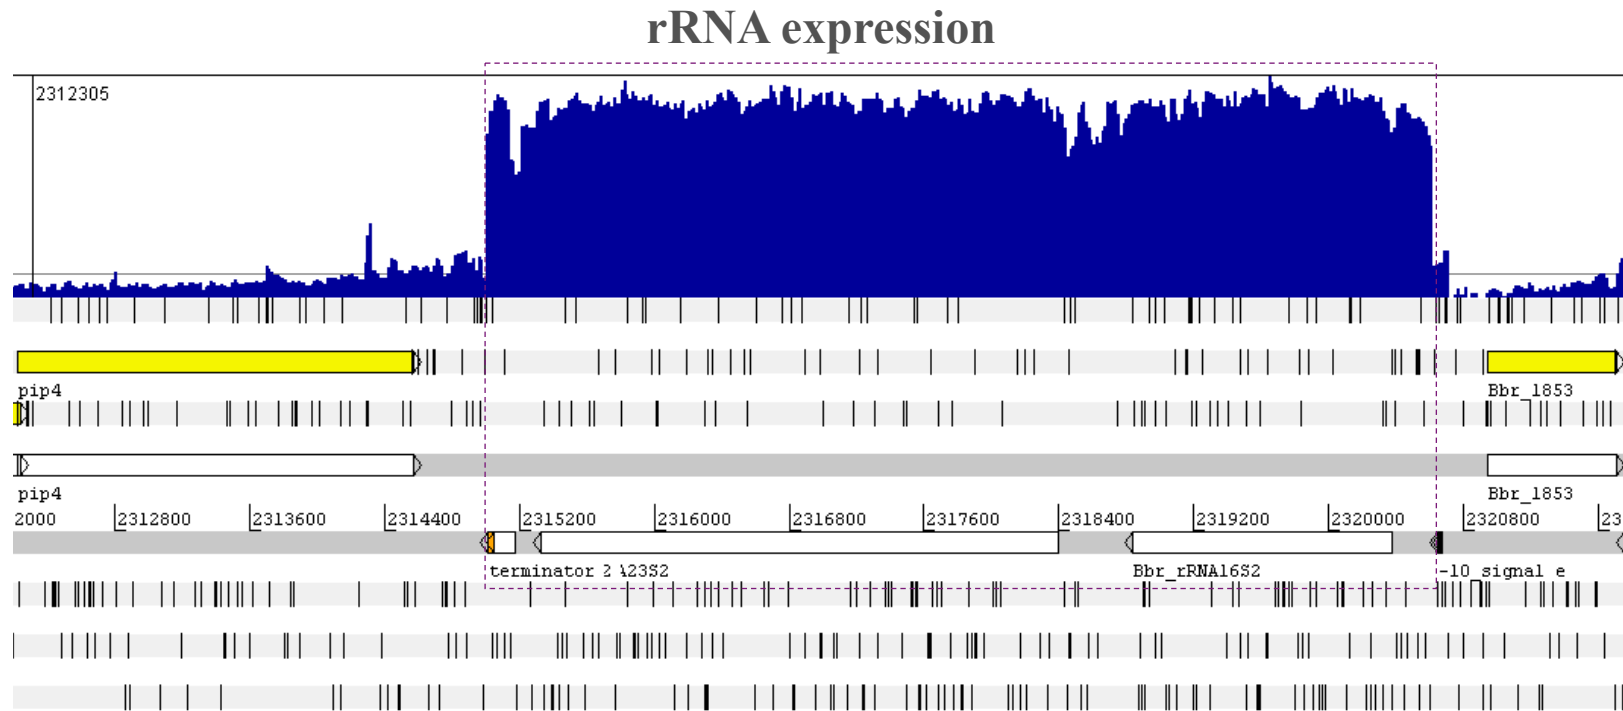

b)

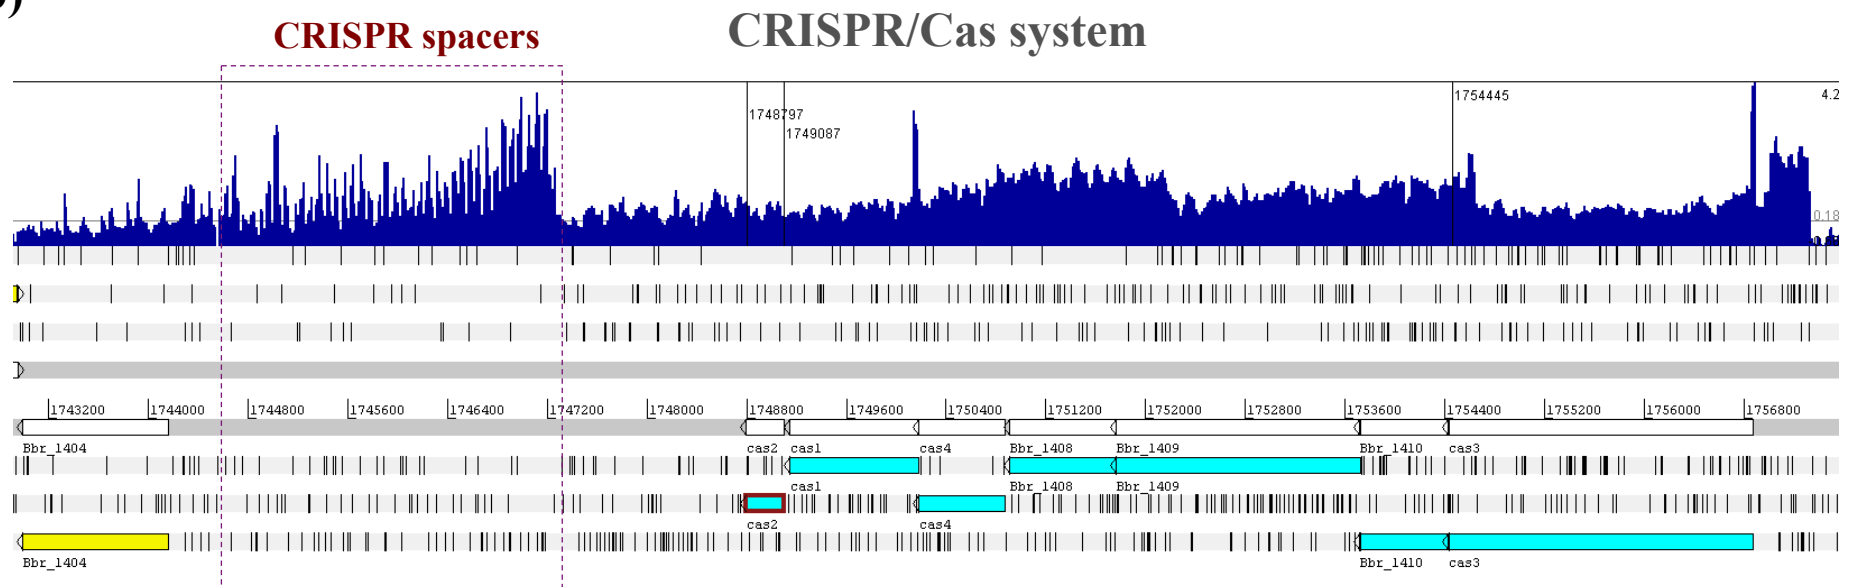

Supplement: 12864_2017_4387_MOESM6_ESM.pdf [file 12864_2017_4387_MOESM6_ESM.pdf]
