# Supplementary material for: Global transcriptional landscape and promoter mapping of the gut commensal Bifidobacterium breve UCC2003
Source: PubMed Central journal article supplement (PMC5746004; doi:10.1186/s12864-017-4387-x), 2017-12-28
Supplement: 12864_2017_4387_MOESM8_ESM.pdf [file 12864_2017_4387_MOESM8_ESM.pdf]

a)

### FMN riboswitch

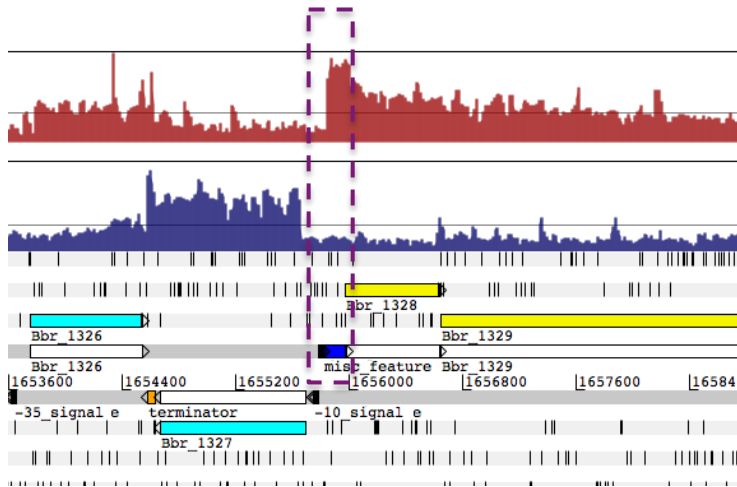

Tiling (forward)

Tiling (reverse)

b)

### TPP riboswitch

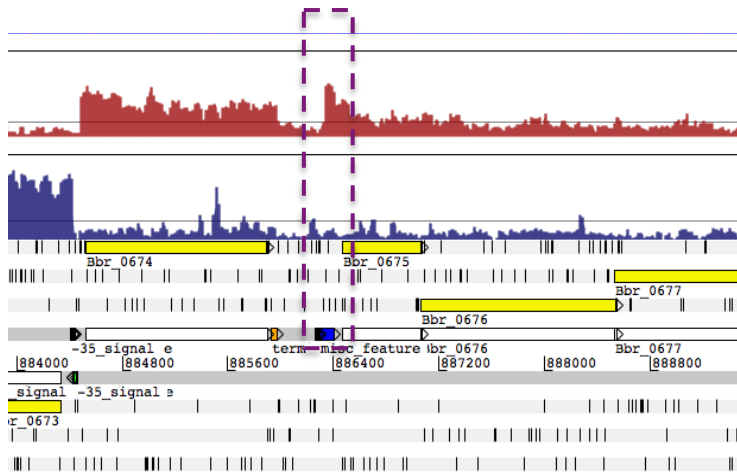

Tiling (forward)

Tiling (reverse)

c)

### YKOK leader

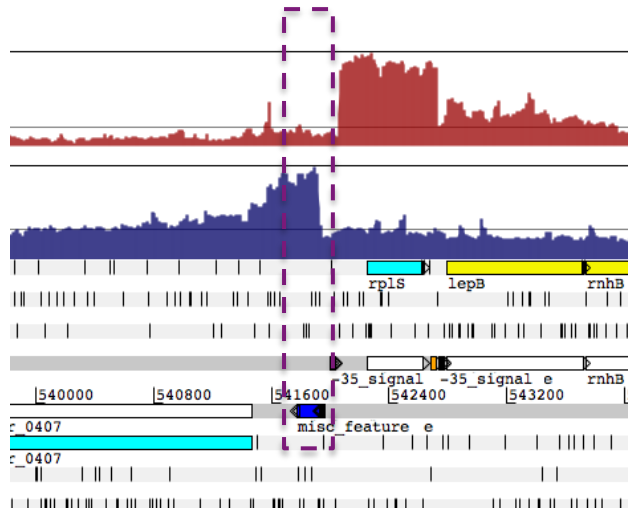

Tiling (forward)

Tiling (reverse)
